# Supplementary material for: Cell Differentiation Trajectory in Liver Cirrhosis Predicts Hepatocellular Carcinoma Prognosis and Reveals Potential Biomarkers for Progression of Liver Cirrhosis to Hepatocellular Carcinoma
Source: Front Genet. 2022 Mar 10;13:858905. doi: 10.3389/fgene.2022.858905 (PMC8960263; doi:10.3389/fgene.2022.858905)
Supplement: Supplementary file 1 [file Table2.XLSX]

## Sheet: Sheet1
Driver-Gene Candidates (DGCs)
TERT
CTNNB1
TP53
ARID2
AXIN1
TSC2
RB1
ACVR2A
BRD7
CDKN1A
MEN1
GALN11
FGF19
CCND1
ARID1A
CDKN2A
CDKN2B
RPS6KA3
NFE2L2
NCOR1
ADH1B
SRCAP
FCRL1
PTEN
HNRNPA2B1
CYP2E1
MAP2K3
TSC1
TMEM99
G6PC
