# Supplementary material for: Cell Differentiation Trajectory in Liver Cirrhosis Predicts Hepatocellular Carcinoma Prognosis and Reveals Potential Biomarkers for Progression of Liver Cirrhosis to Hepatocellular Carcinoma
Source: Front Genet. 2022 Mar 10;13:858905. doi: 10.3389/fgene.2022.858905 (PMC8960263; doi:10.3389/fgene.2022.858905)
Supplement: Supplementary file 2 [file Table3.XLSX]

## Sheet: Sheet1
Immune checkpoint genes (ICGs)
YTHDF1
VTCN1
TNFSF9
TNFSF4
TNFSF18
TNFRSF9
TNFRSF4
TNFRSF18
SIGLEC15
PVR
PTPRC
PDCD1LG2
PDCD1
CD274
LGALS9
LDHC
LDHB
LDHA
LAMA3
LAG3
JAK2
JAK1
IL23A
IL12B
IL12A
IFNG
ICOSLG
ICOS
HAVCR2
FGL1
CTLA4
CD8A
CD86
CD80
CD40LG
CD40
CD28
B2M
