# Supplementary material for: Cell Differentiation Trajectory in Liver Cirrhosis Predicts Hepatocellular Carcinoma Prognosis and Reveals Potential Biomarkers for Progression of Liver Cirrhosis to Hepatocellular Carcinoma
Source: Front Genet. 2022 Mar 10;13:858905. doi: 10.3389/fgene.2022.858905 (PMC8960263; doi:10.3389/fgene.2022.858905)
Supplement: Supplementary file 3 [file Table6.XLSX]

## Sheet: Sheet1
Differentiation Related Genes (DRGs).
VWA1
RBP7
HSPG2
ID3
FAM110D
SH3BGRL3
CD52
LAPTM5
TINAGL1
FAM167B
MARCKSL1
TIE1
PLPP3
JUN
ADGRL4
CYR61
ARHGAP29
CNN3
PALMD
CD53
C1orf162
RHOC
CTSS
S100A10
S100A4
S100A16
S100A13
RAB13
EFNA1
LMNA
MNDA
TAGLN2
CD48
FCER1G
FCGR3A
RGS1
RGS2
PTPRC
CD34
EPHX1
LAPTM4A
EPAS1
SPTBN1
PLEK
VAMP8
DUSP2
CXCR4
CYTIP
NOSTRIN
CALCRL
TFPI
SDPR
IGFBP2
LMCD1
TGFBR2
HYAL2
DNASE1L3
HCLS1
CSTA
RBP1
TM4SF18
TM4SF1
WWTR1
SEC62
HES1
LDB2
KDR
IGFBP7
PLAC8
SPARCL1
EMCN
SPRY1
MGST2
FYB
PLPP1
IL6ST
PPIC
ECSCR.1
CSF1R
SPARC
NRN1
LY86
CD83
SOX4
LST1
AIF1
GPSM3
NOTCH4
HLA-DRA
HLA-DQA1
HLA-DQB1
HLA-DQA2
HLA-DMB
HLA-DMA
HLA-DPA1
HLA-DPB1
FAM26F
CTGF
MYCT1
RNASET2
CPVL
AQP1
RAMP3
NCF1
HSPB1
FGL2
GNG11
CAV2
CAV1
PODXL
CALD1
CYBB
TSPAN7
CXorf36
IL2RG
WBP5
NGFRAP1
TCEAL4
MTUS1
DOK2
CLU
C8orf4
PLAT
SOX17
FAM49B
IL33
NFIB
GSN
ENG
EGFL7
SNHG7
NPDC1
IFITM3
CD151
LSP1
PRKCDBP
CD59
CD44
MDK
SPI1
MPEG1
MS4A6A
MS4A7
ARL2
CCDC85B
UCP2
SERPINH1
PRSS23
RDX
NNMT
FXYD6
JAML
ESAM
VIM
ITGB1
SRGN
MMRN2
SNCG
ADIRF
PDLIM1
RGS10
HTRA1
VWF
CD9
PTMS
A2M
CD69
CLEC7A
YBX3
EMP1
MGP
PPFIBP1
LYZ
PTPRB
GLIPR1
ELK3
NUAK1
FLT1
ALOX5AP
TSC22D1
LCP1
PCDH17
GPR183
EFNB2
TNFSF13B
COL4A1
COL4A2
TMEM255B
RNASE6
RNASE1
CLEC14A
GPR65
IFI27
CRIP2
ANXA2
TPM1
BCL2A1
NR2F2
TMEM204
SLC9A3R2
EMP2
IGSF6
CORO1A
PYCARD
CDH5
COTL1
CYBA
CD68
TMEM88
EVI2B
EVI2A
CCL14
CCL3
CCL4
CCL4L2
IGFBP4
PTRF
RAMP2
RP5-1171I10.5
LIMD2
PECAM1
TCF4
CYB5A
FKBP1A
DSTN
ID1
HCK
MYL9
SAMHD1
TGM2
SOX18
OAZ1
PLVAP
IFI30
HCST
TYROBP
COX7A1
PCAT19
BCAM
SEPW1
FTL
CD37
CLDN5
SELM
TIMP3
RAC2
CYB5R3
TYMP
JAM2
APP
CYYR1
ADAMTS1
ITGB2
TGFBI
ZEB2
RP11-1143G9.4
EGR1
ACTB
VAMP5
C11orf96
CFD
CD74
LTB
LXN
ZNF331
FN1
SERPING1
FCN1
C10orf10
CCND1
HLA-DRB5
TIMP1
PLAUR
IL1B
MGLL
IRF8
NR4A2
CCL3L3
EVL
CLEC10A
APLNR
CTSC
EDN1
SAT1
LGALS2
CD14
CEBPB
INSR
FABP4
IGHG3
MS4A4A
TRAC
TRBC2
ICAM2
S100A9
PSAP
IFITM1
CD2
TFF3
KRT18
VSIG4
GAS6
GIMAP7
CD3D
BGN
PRCP
IGKC
CAPG
KLF2
KRT8
ACKR1
HMOX1
GZMA
CST7
GJA4
HLA-DRB1
FTH1
C1QA
TRBC1
GPX1
C1QC
GZMK
C1QB
NKG7
CFP
HERPUD1
IGFBP5
CCL5
CCDC80
C7
CST3
FCN3
GPX3
NPC2
IGHM
CTSW
AREG
S100A8
KLRB1
CXCL12
IGHG1
CTSB
JCHAIN
IGHG4
SOD3
RARRES2
IGLC3
C1R
CD7
IGHGP
FCER1A
CRHBP
APOD
IGLC2
KRT19
ALB
XCL1
MZB1
IGHA1
COL3A1
SLPI
RGCC
XCL2
KRT7
AGT
IGLC7
MT1E
TAGLN
DEFB1
CCL21
VTN
IGHG2
IGFBP3
TM4SF4
COL1A2
GC
GZMB
FABP5
ANXA4
AMBP
COL1A1
FXYD2
DCN
GNLY
ACTA2
HP
APOE
HBB
PPT1
FCGR1A
S100A11
FCGR2A
GLUL
NCF2
NAGK
CD86
2022-03-01
RNF130
PHACTR1
PILRA
NAMPT
AP1S2
NUP214
RHOG
CD163
CLEC12A
ARPC3
SLC7A7
CTSH
ARRB2
CXCL16
GRN
CTSZ
C5AR1
FPR1
TMEM176B
ITM2A
IFNGR1
ASAH1
LINC01272
C12orf57
BLVRB
FOLR2
CHMP1B
LIPA
SOD2
C15orf48
GPNMB
FKBP11
CTSD
IL32
MARCO
CXCL8
APOC1
CXCL10
LGMN
SEPP1
SLC40A1
LCK
CD247
RHOH
RAC1
PIM2
CD3E
CD27
ISG20
LAT
2022-09-01
ACAP1
GZMM
FCGRT
TBC1D10C
CD3G
PYHIN1
ITM2B
SH2D1A
IFNG
MARCKS
TRAF3IP3
ANXA5
CD63
APOBEC3G
PRF1
DERL3
LGALS3
IL7R
RHOB
NEAT1
FOS
CD79A
STK17A
ITM2C
GZMH
CEBPD
APLP2
CTSL
IL2RB
MAFB
KLF4
KLRD1
CD93
IER3
MEF2C
KCTD12
SERPINA1
CD160
XBP1
BTG2
THBD
IFI6
TUBA1A
PDK4
CLIC3
RARRES3
LPAR6
SGK1
KLRF1
TRDC
HSPA1A
HOPX
LGALS1
SSR4
CD36
S100A6
IGLL5
SEC11C
IGKV1-12
CMC1
CXCL2
CCL2
SPP1
