# Supplementary material for: Cell Differentiation Trajectory in Liver Cirrhosis Predicts Hepatocellular Carcinoma Prognosis and Reveals Potential Biomarkers for Progression of Liver Cirrhosis to Hepatocellular Carcinoma
Source: Front Genet. 2022 Mar 10;13:858905. doi: 10.3389/fgene.2022.858905 (PMC8960263; doi:10.3389/fgene.2022.858905)
Supplement: Supplementary file 4 [file Table4.XLSX]

## Sheet: Sheet1
370 HCC from TCGA cohorts as traning sets
id	futime	fustat	CD34	RAMP3	riskScore	risk
TCGA-DD-A4NQ	1.02192	1	3.24737	2.11667	2.7499	high
TCGA-G3-A5SM	1.42466	0	5.74574	6.06752	0.738962	low
TCGA-MI-A75E	1.38904	0	5.16693	5.69503	0.754949	low
TCGA-DD-A11D	4.27397	1	5.09177	5.06788	1.02374	high
TCGA-CC-5262	0.282192	1	5.50511	5.40075	0.973665	high
TCGA-2Y-A9GY	2.07397	1	3.18248	2.13284	2.67449	high
TCGA-ES-A2HT	1.2	1	5.03717	6.55652	0.463452	low
TCGA-DD-AAW0	5.52055	0	4.43451	5.53948	0.657908	low
TCGA-G3-A3CI	0.493151	0	4.27712	4.92464	0.86494	low
TCGA-DD-AAVV	6.72603	0	5.62716	5.63831	0.892153	low
TCGA-DD-A39Y	0.468493	1	3.30678	2.73684	2.02574	high
TCGA-DD-A1EB	5.52603	0	5.08016	5.34257	0.884054	low
TCGA-DD-A1ED	6.30411	0	4.87901	6.2431	0.520559	low
TCGA-EP-A12J	0.90411	0	5.01138	4.74445	1.18305	high
TCGA-DD-A1EJ	2.75342	1	3.36691	2.85608	1.93811	high
TCGA-G3-AAV2	1.01918	0	5.50554	5.90269	0.749551	low
TCGA-DD-AADY	1.52055	0	5.10105	4.88554	1.12897	high
TCGA-CC-5263	0.353425	1	3.74226	1.74292	3.8737	high
TCGA-DD-AADP	1.25479	0	5.11215	5.30286	0.91121	low
TCGA-BC-A69I	1.06027	0	5.47825	6.05631	0.686239	low
TCGA-ED-A97K	0.0164384	0	3.39765	4.9971	0.640521	low
TCGA-DD-AAVW	6.34795	0	5.98421	6.00848	0.818306	low
TCGA-DD-A4NO	6.15068	0	4.98966	5.74522	0.697528	low
TCGA-BC-A10W	0.249315	1	5.04401	2.90032	3.12491	high
TCGA-LG-A9QC	1.16438	0	5.08815	4.60187	1.3039	high
TCGA-DD-A11C	1.8137	0	6.01212	6.04146	0.811083	low
TCGA-DD-AACV	4.19452	0	3.57325	3.60914	1.39189	high
TCGA-CC-5264	0.279452	1	3.6344	1.67606	3.88401	high
TCGA-DD-AACL	0.293151	1	4.00122	4.21324	1.15426	high
TCGA-DD-A116	4.44384	1	4.91387	4.87337	1.0744	high
TCGA-CC-A7IG	0.819178	1	4.12469	3.31755	1.91048	high
TCGA-DD-AAE9	1.97808	0	3.5459	4.22591	1.0009	high
TCGA-DD-AAVP	7.53973	0	5.40775	5.93633	0.715325	low
TCGA-G3-AAV5	0.969863	0	3.65396	4.78288	0.773178	low
TCGA-G3-A3CG	1.84384	0	5.07294	5.35501	0.876446	low
TCGA-CC-5260	0.238356	1	4.70966	4.49043	1.23424	high
TCGA-CC-A7IJ	1.04658	0	4.17247	4.83446	0.878688	low
TCGA-DD-AADU	1.51781	0	3.8405	5.12387	0.684308	low
TCGA-DD-AAE1	1.51233	0	4.57931	4.6589	1.08729	high
TCGA-2Y-A9HB	0.712329	0	5.03483	5.3273	0.879141	low
TCGA-BD-A2L6	3.73425	0	4.86442	5.81355	0.64841	low
TCGA-DD-A3A9	2.55068	1	5.92661	6.56201	0.602699	low
TCGA-KR-A7K2	1.8	0	4.94814	5.88395	0.640863	low
TCGA-ZS-A9CG	0.934247	0	4.5779	5.29453	0.780238	low
TCGA-K7-A6G5	1.40274	0	4.70052	5.73243	0.64412	low
TCGA-DD-AADS	1.29863	0	5.26548	6.89775	0.41528	low
TCGA-5C-A9VG	0.89863	0	5.13474	5.38392	0.879414	low
TCGA-DD-A1EE	0.956164	1	4.33469	4.16413	1.30818	high
TCGA-BC-A110	5.79726	1	4.6783	7.24538	0.290723	low
TCGA-GJ-A3OU	2.40822	0	5.79223	6.29706	0.664769	low
TCGA-G3-A25U	4.48219	0	4.56729	4.37693	1.25499	high
TCGA-DD-AADB	3.40274	0	4.51238	4.22476	1.33654	high
TCGA-DD-AAVZ	5.20548	0	4.71167	5.03221	0.931057	low
TCGA-BC-A216	3.70137	0	2.34923	1.94373	2.3015	high
TCGA-DD-A1EF	1.07945	1	4.77422	4.29315	1.39459	high
TCGA-DD-AADL	1.74247	0	4.22774	3.81858	1.51722	high
TCGA-KR-A7K8	2.48219	0	5.36256	5.18637	1.04344	high
TCGA-ED-A7PX	0.0164384	0	4.96383	4.85669	1.10007	high
TCGA-DD-AADK	2.87397	0	5.0001	6.13763	0.570237	low
TCGA-BW-A5NO	0.0547945	0	4.78524	4.29503	1.39781	high
TCGA-DD-A39W	2.26575	1	4.32165	4.66657	1.00276	high
TCGA-GJ-A9DB	0.183562	1	4.43051	5.65975	0.617179	low
TCGA-DD-A1EA	6.61644	0	4.71821	3.69769	1.87079	high
TCGA-UB-A7MD	0.142466	1	5.33789	6.35382	0.563512	low
TCGA-ES-A2HS	1.88493	1	5.37038	6.73968	0.465304	low
TCGA-G3-A3CJ	1.6274	0	4.5755	5.1978	0.82001	low
TCGA-FV-A3R2	0.531507	1	3.86515	3.43027	1.6671	high
TCGA-BW-A5NQ	0	0	4.40545	4.54666	1.09451	high
TCGA-2Y-A9GZ	2.32329	1	4.70184	4.8122	1.04117	high
TCGA-4R-AA8I	0.717808	1	4.78139	4.16954	1.49062	high
TCGA-DD-A4NG	2.19726	1	4.8124	4.29376	1.41013	high
TCGA-RC-A6M5	0.0410959	0	5.92648	7.02545	0.473303	low
TCGA-2Y-A9H0	10.0685	0	3.43871	3.33846	1.53976	high
TCGA-DD-A11B	0.0383562	1	4.58836	5.23127	0.808928	low
TCGA-G3-A25V	2.35616	0	5.23926	6.31576	0.558125	low
TCGA-DD-AADQ	1.19452	0	4.39616	4.5478	1.09083	high
TCGA-CC-A8HS	0.821918	1	4.68638	3.37053	2.19777	high
TCGA-DD-A1EL	1.13699	1	4.19103	3.14111	2.13649	high
TCGA-WQ-AB4B	1.08219	0	5.24261	5.85068	0.712006	low
TCGA-DD-A39X	4.6411	1	4.87659	5.62232	0.719003	low
TCGA-RC-A6M3	0	0	3.14676	2.81713	1.85204	high
TCGA-DD-AACU	4.29315	0	4.70292	4.90975	0.989856	high
TCGA-WX-AA47	1.52329	1	3.84493	4.74776	0.833672	low
TCGA-DD-A3A4	1.67671	1	5.06963	5.7991	0.694597	low
TCGA-DD-A4NE	1.80822	1	4.93442	4.60362	1.24427	high
TCGA-DD-AADV	1.5726	0	4.71407	4.656	1.13365	high
TCGA-DD-AACA	6.30411	0	5.00478	4.5319	1.3191	high
TCGA-DD-AACX	0.465753	0	3.82571	3.95747	1.2516	high
TCGA-DD-AACC	4.61644	1	4.43619	6.69475	0.360391	low
TCGA-G3-A5SK	2.03836	0	3.28618	4.89146	0.654637	low
TCGA-EP-A2KA	0.978082	0	3.74872	3.77337	1.34639	high
TCGA-DD-A1EC	1.64932	0	4.5519	5.25011	0.792344	low
TCGA-DD-AAD3	3.54795	0	5.45401	5.64695	0.843395	low
TCGA-DD-AACS	4.94247	0	4.29096	4.34843	1.1729	high
TCGA-BD-A3ER	3.05479	0	5.49087	6.08373	0.67905	low
TCGA-GJ-A6C0	0.0849315	1	3.98429	2.94174	2.22863	high
TCGA-2Y-A9GS	1.98356	1	4.47298	4.66372	1.05067	high
TCGA-BC-A8YO	1.53973	0	3.60088	2.90147	2.02974	high
TCGA-CC-A9FW	0.679452	0	3.03584	2.87756	1.73614	high
TCGA-DD-AAVQ	7.47397	0	4.79741	5.64166	0.69516	low
TCGA-BD-A3EP	1.12055	0	5.62519	6.39966	0.599484	low
TCGA-DD-A39V	1.76164	1	4.82942	5.68477	0.686237	low
TCGA-DD-A3A1	0.638356	1	4.08829	4.44374	1.05051	high
TCGA-DD-A4NR	0.0246575	1	4.60716	5.18637	0.83275	low
TCGA-DD-AAC9	0.950685	0	5.27784	6.5602	0.49703	low
TCGA-CC-5259	0.684932	0	3.81923	4.51945	0.931889	low
TCGA-DD-A4NK	3.31507	1	4.3809	4.64722	1.03101	high
TCGA-DD-A3A5	8.56164	1	5.0955	5.65877	0.753121	low
TCGA-NI-A4U2	4.90685	1	5.60268	5.99945	0.733644	low
TCGA-DD-A4NF	1.1726	0	5.35584	4.9273	1.19197	high
TCGA-DD-A11A	0.216438	0	4.57094	3.78582	1.7099	high
TCGA-DD-AAD0	0.375342	0	3.3288	1.84982	3.2382	high
TCGA-DD-A3A6	8.92603	1	5.35057	6.61635	0.493283	low
TCGA-DD-A114	3.14795	1	5.11062	6.03229	0.622648	low
TCGA-5C-AAPD	0.0547945	0	4.82685	5.62068	0.709012	low
TCGA-HP-A5N0	2.06027	1	6.48948	6.33023	0.804592	low
TCGA-T1-A6J8	0.0630137	0	4.4796	5.17353	0.807013	low
TCGA-XR-A8TC	3.66849	0	4.74564	5.00504	0.953968	low
TCGA-DD-AACK	0.0246575	0	4.90881	3.94958	1.7366	high
TCGA-MI-A75C	0.79726	0	3.41544	3.98616	1.09085	high
TCGA-DD-AACP	1.13699	0	3.72172	3.5137	1.52922	high
TCGA-DD-AACT	4.27945	0	4.52312	5.87376	0.567488	low
TCGA-DD-A73E	0.120548	0	4.64197	4.83824	1.00893	high
TCGA-BC-4072	4.08219	1	4.30063	4.84194	0.909411	low
TCGA-BC-4073	0.964384	0	4.23097	3.44838	1.84204	high
TCGA-XR-A8TG	2.46027	0	4.15663	4.16922	1.23716	high
TCGA-RC-A6M6	0.0246575	0	3.73482	3.11478	1.89019	high
TCGA-BC-A69H	1.21644	0	4.39734	2.02891	4.05799	high
TCGA-DD-AAC8	0.0438356	1	4.76167	3.49241	2.10934	high
TCGA-DD-AADJ	2.92055	0	5.04052	5.2956	0.895309	low
TCGA-2Y-A9H9	1.90959	0	5.25371	5.63132	0.800931	low
TCGA-ED-A5KG	1.32055	0	5.27568	7.54	0.298007	low
TCGA-DD-AACO	5.13973	0	5.05331	5.25085	0.919955	low
TCGA-G3-A25Z	1.79452	0	4.99859	5.65545	0.732909	low
TCGA-DD-A4NV	5.52877	0	4.85299	6.10278	0.55574	low
TCGA-FV-A2QR	1.59178	1	5.59664	5.46689	0.966722	high
TCGA-G3-AAV7	0.989041	0	3.78322	2.62164	2.47999	high
TCGA-2Y-A9H4	3.97808	0	5.45711	5.96148	0.716485	low
TCGA-3K-AAZ8	1.08493	0	3.58497	4.07694	1.09444	high
TCGA-CC-5261	0.265753	1	5.25937	6.01732	0.656026	low
TCGA-ZP-A9D2	2.03562	0	4.49718	4.55142	1.12211	high
TCGA-2Y-A9H5	1.52055	1	5.14122	4.8567	1.1599	high
TCGA-G3-A25T	4.25479	0	4.49117	5.64961	0.631792	low
TCGA-DD-AAEA	1.57534	0	3.19381	4.10928	0.957517	high
TCGA-RG-A7D4	3.00822	0	3.39828	3.97388	1.09225	high
TCGA-DD-AACD	1.04384	1	5.26932	5.44916	0.88485	low
TCGA-DD-AAD8	3.33973	0	3.65555	4.42384	0.932799	low
TCGA-5R-AAAM	0.126027	1	4.93261	5.97539	0.608195	low
TCGA-EP-A3JL	0.830137	0	5.30026	6.20076	0.603508	low
TCGA-DD-A73G	9.52877	0	5.13213	4.42786	1.44662	high
TCGA-G3-AAV4	0.0739726	1	4.80206	4.58856	1.20548	high
TCGA-ED-A459	1.11781	0	3.88388	1.84219	3.83717	high
TCGA-DD-A73C	1.92055	0	6.12951	6.35547	0.713149	low
TCGA-MR-A520	0.627397	0	3.99066	5.06738	0.737083	low
TCGA-G3-A7M5	1.22466	0	3.95182	5.34721	0.629668	low
TCGA-MI-A75G	1.91233	0	4.3819	4.86599	0.920139	low
TCGA-CC-A7IK	0.717808	1	4.32123	3.85232	1.53296	high
TCGA-G3-A5SJ	1.91233	0	4.32555	3.87055	1.52042	high
TCGA-DD-AAE4	1.66575	0	5.93312	6.91817	0.501526	low
TCGA-CC-A3M9	0.821918	1	4.91168	4.83819	1.09357	high
TCGA-DD-A4NI	1.53699	0	4.69285	5.45048	0.74442	low
TCGA-G3-AAV3	1.12877	0	4.6555	5.01215	0.925196	low
TCGA-UB-A7MA	1.46575	0	4.12852	3.23557	1.9962	high
TCGA-UB-A7MF	0.586301	1	4.26935	3.79366	1.55628	high
TCGA-BC-A112	0.419178	1	4.98858	4.29244	1.48732	high
TCGA-BC-A10U	2.29315	1	2.74419	2.47021	1.96792	high
TCGA-BC-A5W4	1.49863	1	2.43269	3.42944	1.08742	high
TCGA-FV-A3I1	0.676712	1	4.65036	4.57705	1.15903	high
TCGA-CC-A123	0.6	0	4.66368	4.25631	1.37548	high
TCGA-WQ-A9G7	0.0821918	0	2.99971	4.11347	0.901629	low
TCGA-ED-A66X	1.11233	0	5.17543	4.9678	1.10586	high
TCGA-DD-A1EK	1.52877	1	4.79777	4.31989	1.38499	high
TCGA-DD-AADM	0.0328767	1	4.87485	5.62827	0.716404	low
TCGA-MR-A8JO	0.90411	0	6.87425	6.64839	0.76458	low
TCGA-QA-A7B7	0.257534	0	4.20163	3.35418	1.9179	high
TCGA-CC-A8HT	0.383562	1	3.20158	2.05655	2.79894	high
TCGA-FV-A4ZP	6.81096	1	4.33873	4.95862	0.865527	low
TCGA-DD-A4NJ	2.08219	0	4.89522	4.31374	1.43046	high
TCGA-CC-5258	0.353425	1	4.73275	2.78506	3.02395	high
TCGA-EP-A2KB	0.915068	0	4.08261	4.4192	1.06223	high
TCGA-G3-A25X	4.87397	0	5.14087	4.97811	1.08864	high
TCGA-ED-A7PY	1.06849	0	3.55682	4.7167	0.777445	low
TCGA-EP-A2KC	0.0520548	1	4.76504	5.47734	0.750061	low
TCGA-BC-A10X	2.10959	1	3.91767	6.73639	0.302068	low
TCGA-CC-A7IH	1	0	4.9922	5.54463	0.775025	low
TCGA-DD-A3A8	0.030137	1	4.09654	5.37037	0.649582	low
TCGA-CC-A7IL	0.761644	1	3.97871	4.1388	1.19191	high
TCGA-BC-A10Z	0.0931507	1	3.77377	3.26722	1.76618	high
TCGA-UB-AA0U	0.89589	0	4.72407	5.33561	0.79777	low
TCGA-DD-AAEE	2.21918	0	4.92347	5.30552	0.860105	low
TCGA-ZP-A9D0	1.96438	0	4.43774	4.88461	0.926571	low
TCGA-DD-A1EG	3.7589	1	5.19605	5.79084	0.72443	low
TCGA-RC-A6M4	0.060274	0	3.87273	4.10088	1.17784	high
TCGA-ED-A7XP	1.09589	0	5.0001	4.45783	1.36913	high
TCGA-2Y-A9HA	0.0986301	1	4.70861	3.91538	1.66527	high
TCGA-DD-AAE2	1.74795	0	5.39846	5.31683	0.985334	high
TCGA-DD-AADF	0.315068	1	3.92397	5.23216	0.66306	low
TCGA-DD-AACW	3.90137	0	4.52816	5.35134	0.746299	low
TCGA-MI-A75I	1.72603	0	4.23365	4.3636	1.14392	high
TCGA-FV-A3I0	2.32329	0	4.53662	3.28806	2.194	high
TCGA-2Y-A9H1	3.36712	1	5.045	5.85784	0.668709	low
TCGA-CC-A8HU	0.942466	1	3.7041	2.74637	2.26958	high
TCGA-DD-AAD2	1.80274	0	5.50326	5.49372	0.927077	low
TCGA-BC-A10R	0.843836	1	5.79578	5.32548	1.10445	high
TCGA-G3-A5SL	1.70137	0	5.08053	4.98013	1.06807	high
TCGA-CC-A1HT	0.276712	1	4.44131	5.00705	0.870191	low
TCGA-2Y-A9GV	6.93699	1	5.08815	6.23782	0.555629	low
TCGA-ED-A7XO	1.16986	0	4.68779	5.94047	0.575711	low
TCGA-CC-A5UC	0.950685	1	5.62526	5.49084	0.962915	high
TCGA-DD-AADI	2.9726	0	4.94204	6.08311	0.576598	low
TCGA-DD-A4NA	2.76164	0	4.11607	3.38513	1.83959	high
TCGA-BC-A10T	2.29315	1	5.88079	5.38296	1.09939	high
TCGA-RC-A7SH	1.28219	0	3.97804	3.71956	1.48283	high
TCGA-WJ-A86L	0.945205	0	3.19246	3.86993	1.08436	high
TCGA-DD-AA3A	1.12329	1	3.61499	3.89238	1.21585	high
TCGA-CC-A7IE	0.594521	1	4.62192	2.53217	3.33786	high
TCGA-DD-AAVS	4.99452	0	4.47497	4.64402	1.06215	high
TCGA-DD-AAE7	1.76438	0	5.31699	6.28952	0.579099	low
TCGA-BC-A3KG	1.36438	0	4.08415	2.40846	3.03214	high
TCGA-DD-A3A2	5.83836	1	4.08772	6.15409	0.430545	low
TCGA-DD-AAVR	6.88493	0	6.04333	6.78931	0.554324	low
TCGA-CC-A7II	1.09315	0	4.25238	2.34763	3.29108	high
TCGA-DD-AACN	3.56712	0	4.94449	5.63445	0.729105	low
TCGA-2Y-A9GX	6.69041	0	4.94195	5.60604	0.739422	low
TCGA-CC-A3MA	0.830137	1	5.37436	4.70946	1.34275	high
TCGA-DD-AACQ	1.18356	1	4.06484	4.1538	1.21343	high
TCGA-RC-A7SF	1.5863	0	3.64388	4.03777	1.13684	high
TCGA-DD-AADW	1.60822	0	5.07935	4.58949	1.3089	high
TCGA-G3-A3CH	2.13699	0	4.76232	5.69503	0.669036	low
TCGA-DD-A1EI	0.50137	0	5.31226	5.62118	0.81938	low
TCGA-ZP-A9CZ	1.93425	0	4.87185	4.6801	1.1735	high
TCGA-KR-A7K0	0.178082	1	5.0676	5.55977	0.78644	low
TCGA-BC-A10Y	1.94795	1	4.78657	4.26523	1.42027	high
TCGA-ED-A8O5	1.11233	0	5.7203	5.49079	0.990658	high
TCGA-CC-A9FS	0.578082	0	4.21496	5.73291	0.55705	low
TCGA-UB-A7MB	1.64658	0	4.10108	3.44896	1.77144	high
TCGA-ED-A627	1.1589	0	4.23811	7.17757	0.264091	low
TCGA-XR-A8TE	2.53425	0	4.3734	4.58155	1.06454	high
TCGA-DD-AACF	1	1	4.91681	4.25508	1.48442	high
TCGA-K7-A5RF	1.72877	0	3.52876	6.14053	0.366949	low
TCGA-ZP-A9D1	0.0575342	0	5.36127	5.68358	0.804842	low
TCGA-G3-A7M7	0.989041	0	4.6721	5.51435	0.715592	low
TCGA-G3-AAUZ	1.31507	0	5.02344	6.44415	0.489409	low
TCGA-RC-A7SK	1.29315	0	4.60118	5.39931	0.743909	low
TCGA-DD-AACI	4.43288	0	5.38896	5.8378	0.748818	low
TCGA-DD-A4NH	1.89041	0	3.79217	2.76659	2.30562	high
TCGA-WX-AA46	2.07123	0	3.35009	7.30735	0.189326	low
TCGA-G3-A7M6	1.73151	0	5.01281	5.44616	0.820895	low
TCGA-FV-A2QQ	1.99726	0	5.1555	5.77556	0.721435	low
TCGA-ZP-A9D4	1.08219	0	4.43515	4.33662	1.23207	high
TCGA-CC-A5UD	0.832877	1	4.67273	4.48043	1.22709	high
TCGA-DD-A119	0.610959	1	5.15363	5.10681	1.02186	high
TCGA-DD-AACB	6.36712	0	4.3367	4.73615	0.971392	high
TCGA-FV-A495	0.00273973	0	5.19803	6.77761	0.43331	low
TCGA-DD-A1EH	4.09589	0	5.06653	4.67936	1.24421	high
TCGA-DD-AAEH	2.14795	0	5.43625	6.55642	0.522129	low
TCGA-DD-AAW1	5.44932	0	4.53075	5.78347	0.596201	low
TCGA-DD-A118	9.41644	0	5.74324	4.45252	1.71401	high
TCGA-DD-AADA	3.37808	0	5.32303	6.39811	0.548209	low
TCGA-ED-A66Y	0.810959	1	3.9944	3.02366	2.1419	high
TCGA-DD-AAE3	1.55068	0	6.29718	6.10906	0.852554	low
TCGA-G3-AAV6	0.178082	1	4.02341	3.08425	2.09335	high
TCGA-5R-AA1C	0.99726	0	3.66651	4.25228	1.02344	high
TCGA-ED-A8O6	0.153425	1	3.8266	2.54965	2.60842	high
TCGA-DD-AADD	3.3726	0	3.75217	3.40243	1.63537	high
TCGA-BC-A10S	3.89863	1	5.37571	5.33702	0.968415	high
TCGA-CC-A9FV	0	0	4.38253	5.69336	0.597832	low
TCGA-DD-AAEB	1.30959	0	5.27869	6.73759	0.453233	low
TCGA-WX-AA44	1.68493	0	3.4655	4.33243	0.924367	low
TCGA-PD-A5DF	1.75068	1	5.29204	4.7741	1.26673	high
TCGA-YA-A8S7	1.12877	1	3.83828	4.83227	0.796153	low
TCGA-5R-AA1D	0.923288	0	6.83528	7.34948	0.524335	low
TCGA-DD-AACH	0.534247	1	4.66428	3.74166	1.79918	high
TCGA-CC-A8HV	0.764384	1	3.32556	1.68814	3.51963	high
TCGA-BW-A5NP	0	0	4.29816	3.41451	1.91285	high
TCGA-G3-AAV0	1.30411	0	4.07988	6.13072	0.434802	low
TCGA-DD-AAED	2.09041	0	1.98076	1.56797	2.50797	high
TCGA-2Y-A9H6	0.978082	0	5.54788	6.07361	0.694363	low
TCGA-2Y-A9GW	3.48219	1	5.05528	5.56541	0.781253	low
TCGA-DD-A73D	1.89863	0	3.8862	4.15605	1.14905	high
TCGA-DD-A115	6.96438	1	5.2489	5.57611	0.823143	low
TCGA-XR-A8TF	1.89863	1	4.32295	5.02094	0.833913	low
TCGA-CC-A3MC	0.994521	0	4.49283	4.14883	1.38242	high
TCGA-DD-A73A	1.99452	0	4.63423	4.75375	1.05194	high
TCGA-DD-AADG	3.13699	0	4.77623	5.77837	0.643251	low
TCGA-DD-A4NL	4.68767	0	5.54017	6.8823	0.454423	low
TCGA-BC-A10Q	3.10959	1	4.26901	3.09062	2.24515	high
TCGA-2Y-A9GU	5.31233	0	4.92493	5.29001	0.867465	low
TCGA-ZP-A9CV	2.98082	1	4.84408	5.48881	0.763395	low
TCGA-DD-A113	6.64384	0	5.13772	5.11639	1.01196	high
TCGA-2Y-A9GT	4.44932	1	5.41917	6.12992	0.648851	low
TCGA-UB-A7ME	1.33151	0	4.80712	5.81878	0.635676	low
TCGA-G3-A7M9	0.153425	1	2.86504	2.47805	2.03191	high
TCGA-DD-AACJ	5.7589	0	4.43454	3.04789	2.41205	high
TCGA-DD-AAEK	2.92329	0	4.86281	5.1256	0.927742	low
TCGA-DD-A4ND	6.11507	0	5.39243	5.18378	1.05422	high
TCGA-2Y-A9H7	3.2	0	4.81491	5.91111	0.607209	low
TCGA-RC-A7S9	1.75342	0	3.55405	4.69977	0.783689	low
TCGA-ZS-A9CE	3.4	0	3.91267	4.5774	0.929733	low
TCGA-DD-A73B	0.775342	1	4.17185	3.75109	1.54556	high
TCGA-RC-A7SB	1.61096	0	3.86387	5.11379	0.692732	low
TCGA-DD-AADN	2.46027	0	3.6098	4.71798	0.789316	low
TCGA-CC-A5UE	0.745205	1	2.97145	3.53999	1.20567	high
TCGA-DD-AACZ	0.468493	1	4.54782	2.481	3.35311	high
TCGA-DD-A3A3	1.46575	1	4.42288	4.53185	1.10875	high
TCGA-2Y-A9H8	1.73425	1	4.15011	3.76368	1.52551	high
TCGA-G3-A5SI	2.10411	1	4.65728	4.74778	1.06251	high
TCGA-DD-AAE6	0.386301	0	3.2564	4.10152	0.979536	high
TCGA-DD-AACG	1.28493	1	4.27008	4.25665	1.22275	high
TCGA-DD-AADC	1.16438	1	4.54323	4.22476	1.34891	high
TCGA-ZS-A9CF	6.60822	0	4.84163	4.67849	1.16393	high
TCGA-NI-A8LF	1.66027	0	5.52346	5.76405	0.810063	low
TCGA-DD-A39Z	1.64658	1	4.76412	4.84776	1.04123	high
TCGA-EP-A3RK	0.994521	0	5.1129	5.33003	0.898598	low
TCGA-FV-A496	0.0273973	0	4.1062	4.50472	1.02309	high
TCGA-CC-A3MB	0.863014	1	4.16549	3.42666	1.82695	high
TCGA-CC-A7IF	1.77808	1	4.39859	5.27907	0.745547	low
TCGA-ZS-A9CD	3.79726	1	5.27493	6.01412	0.660181	low
TCGA-G3-A25S	1.13973	1	3.62877	4.2812	0.996822	high
TCGA-BC-A217	1.15342	0	2.88286	2.98131	1.57127	high
TCGA-DD-AAW2	5.08219	0	5.75597	5.26889	1.12408	high
TCGA-DD-AAD6	1.8411	0	2.80459	3.95731	0.922757	low
TCGA-ED-A4XI	1.05753	0	5.26057	6.16264	0.608372	low
TCGA-HP-A5MZ	0.249315	1	5.94522	6.21069	0.727896	low
TCGA-DD-AAVU	6.03288	0	3.92871	4.09319	1.2025	high
TCGA-DD-A73F	2.9726	0	5.1813	6.00516	0.644987	low
TCGA-DD-A4NN	2.46301	1	5.04548	3.17559	2.70827	high
TCGA-DD-AAEI	4.19452	0	4.61301	5.35096	0.7656	low
TCGA-UB-AA0V	0.860274	0	5.00266	6.75973	0.412587	low
TCGA-DD-AADO	1.2411	0	3.99817	3.97711	1.30431	high
TCGA-DD-AAVY	5.39726	0	4.3342	4.31812	1.20707	high
TCGA-FV-A3R3	1.00274	1	6.01773	5.3393	1.17165	high
TCGA-DD-A4NS	6.72877	1	5.43614	6.97481	0.419779	low
TCGA-MI-A75H	2.04658	0	5.58964	6.22759	0.648834	low
TCGA-UB-A7MC	1.36986	0	3.98179	3.76397	1.45051	high
TCGA-FV-A4ZQ	0.0328767	0	3.25904	3.38362	1.42538	high
TCGA-DD-AAEG	1.96986	0	5.07975	5.09049	1.00811	high
TCGA-DD-AAD5	3.68493	0	2.96205	3.0166	1.57953	high
TCGA-K7-A5RG	1.42192	0	4.58157	5.62012	0.659133	low
TCGA-XR-A8TD	2.82192	0	5.28085	5.92141	0.694103	low
TCGA-DD-AACY	3.9726	0	4.82159	5.32102	0.827615	low
TCGA-CC-A9FU	0	0	3.14551	1.80637	3.13599	high
TCGA-KR-A7K7	1.11507	0	3.6793	5.06976	0.670814	low
TCGA-G3-A25Y	1.23836	1	5.23684	4.73146	1.27403	high
TCGA-K7-AAU7	0.983562	0	4.24734	3.6746	1.64511	high
TCGA-BC-A3KF	0.0219178	0	5.09842	5.62386	0.767625	low
TCGA-LG-A9QD	1.00274	0	3.85728	4.36398	1.02212	high
TCGA-G3-AAV1	0.983562	1	5.10611	3.79128	2.00046	high
TCGA-O8-A75V	1.47397	0	5.38153	5.55679	0.865066	low
TCGA-ZP-A9CY	2.14247	0	4.5847	5.46252	0.716255	low
TCGA-G3-A7M8	1.17808	0	4.9092	5.53545	0.759683	low
TCGA-DD-AAE0	1.52055	0	4.09344	4.41964	1.06543	high
TCGA-DD-A3A7	1.14795	1	4.07911	5.11578	0.737946	low
TCGA-DD-AACE	5.98356	0	4.85173	5.12481	0.925055	low
TCGA-2Y-A9H3	4.15342	0	5.87825	6.92617	0.491322	low
TCGA-DD-A4NB	1.07123	0	6.34454	6.15747	0.843145	low
TCGA-EP-A26S	0.649315	0	4.68087	5.54159	0.707348	low
TCGA-DD-AAVX	4.70685	0	5.13569	6.12296	0.598359	low
TCGA-ED-A7PZ	0.0164384	0	4.05596	3.17127	2.02003	high
TCGA-LG-A6GG	1.06027	0	4.53205	4.37334	1.24418	high
TCGA-2Y-A9H2	4.74247	0	3.65704	4.40716	0.941368	low
TCGA-DD-AAW3	4.47397	0	4.75618	5.41033	0.77468	low
TCGA-ED-A82E	1.11781	0	4.755	4.39751	1.31317	high
TCGA-DD-A4NP	8.50411	0	4.13012	5.6544	0.56581	low
TCGA-G3-A6UC	1.83836	0	4.4478	5.40975	0.70675	low
TCGA-DD-AAD1	1.54521	0	5.35334	6.08781	0.650346	low
TCGA-G3-A3CK	1.60274	0	4.40645	5.27286	0.749724	low
TCGA-5C-A9VH	0.882192	0	5.9383	5.78065	0.90898	low
TCGA-FV-A23B	5.07397	1	5.33749	5.3425	0.954692	high
TCGA-DD-AADR	5.55616	0	5.0512	5.39269	0.853837	low
