# Supplementary material for: Cell Differentiation Trajectory in Liver Cirrhosis Predicts Hepatocellular Carcinoma Prognosis and Reveals Potential Biomarkers for Progression of Liver Cirrhosis to Hepatocellular Carcinoma
Source: Front Genet. 2022 Mar 10;13:858905. doi: 10.3389/fgene.2022.858905 (PMC8960263; doi:10.3389/fgene.2022.858905)
Supplement: Supplementary file 5 [file Table1.XLSX]

## Sheet: Sheet1
Clinical data of HCC patiens from TCGA
Id	futime	fustat	age	gender	grade	stage	T	M	N
TCGA-DD-A1EA	2415	0	68	MALE	G2	Stage II	T2	M0	N0
TCGA-KR-A7K0	65	1	65	MALE	G1	Stage I	T1	M0	N0
TCGA-DD-A4NS	2456	1	61	FEMALE	G2	Stage I	T1	M0	N0
TCGA-CC-A5UC	347	1	63	MALE	G3	Stage IIIA	T3	M0	N0
TCGA-G3-AAV7	361	0	38	MALE	G2	Stage II	T2	M0	N0
TCGA-DD-AAED	763	0	51	MALE	G3	Stage I	T1	M0	N0
TCGA-DD-AAE0	555	0	45	FEMALE	G4	Stage IIIA	T3a	M0	N0
TCGA-CC-A3M9	300	1	45	MALE	G3	Stage IIIA	T3	M0	N0
TCGA-DD-A3A4	612	1	37	MALE	G3	Stage IIIA	T3	M0	N0
TCGA-DD-AADB	1242	0	51	MALE	G4	Stage I	T1	M0	N0
TCGA-G3-A25V	860	0	68	MALE	G2	Stage I	T1	M0	N0
TCGA-DD-AAE7	644	0	72	MALE	G2	Stage I	T1	M0	N0
TCGA-LG-A9QC	425	0	48	MALE	G2	Stage I	T1	M0	NX
TCGA-DD-AAEH	784	0	73	MALE	G2	Stage I	T1	M0	N0
TCGA-DD-AAW1	1989	0	55	MALE	G2	Stage IIIA	T3	M0	N0
TCGA-2Y-A9H9	697	0	70	MALE	G2	Stage I	T1	MX	N0
TCGA-5C-AAPD	20	0	61	MALE	G1	Stage II	T2	M0	N0
TCGA-EP-A2KA	357	0	52	FEMALE	G3	Stage IIIA	T3a	MX	NX
TCGA-DD-A73B	283	1	72	FEMALE	G2	Stage I	T1	M0	N0
TCGA-UB-A7MD	52	1	67	MALE	G3	Stage I	T1	MX	N0
TCGA-DD-A113	2425	0	55	FEMALE	G3	Stage II	T2	M0	N0
TCGA-5C-A9VH	322	0	70	MALE	G2	Stage I	T1	M0	N0
TCGA-ED-A5KG	482	0	60	FEMALE	G2	Stage II	T2	M0	N0
TCGA-BC-A10U	837	1	69	MALE	G2	unknow	T2	MX	NX
TCGA-DD-A39V	643	1	77	MALE	G3	Stage II	T2	M0	NX
TCGA-ED-A627	423	0	74	MALE	G2	Stage I	T1	M0	NX
TCGA-G3-AAV2	372	0	50	MALE	G1	Stage I	T1	M0	N0
TCGA-ZS-A9CD	1386	1	73	MALE	G2	Stage II	T2	MX	NX
TCGA-GJ-A9DB	67	1	68	MALE	G2	Stage I	T1	MX	N0
TCGA-G3-AAV4	27	1	83	FEMALE	G1	Stage I	T1	M0	N0
TCGA-DD-AADP	458	0	45	MALE	G3	Stage I	T1	M0	N0
TCGA-DD-A4NL	1711	0	46	MALE	G1	Stage I	T1	M0	N0
TCGA-CC-5261	97	1	44	MALE	G2	Stage II	T2	M0	N0
TCGA-UB-A7MC	500	0	59	MALE	G3	Stage IIIA	T3a	MX	N0
TCGA-CC-A7IF	649	1	59	MALE	G1	Stage IIIA	T3	M0	N0
TCGA-4R-AA8I	262	1	66	MALE	G2	Stage II	T2	MX	NX
TCGA-DD-A73C	701	0	65	FEMALE	G1	Stage IIIA	T3a	M0	N0
TCGA-CC-5259	250	0	60	FEMALE	G2	Stage IIIC	T4	M0	N0
TCGA-2Y-A9GW	1271	1	64	MALE	G2	Stage I	T1	MX	N0
TCGA-BC-A10S	1423	1	81	MALE	G1	unknow	T3	MX	NX
TCGA-UB-A7ME	486	0	51	MALE	G2	Stage I	T1	MX	NX
TCGA-ED-A97K	6	0	54	MALE	G2	Stage IIIA	T3a	M0	N0
TCGA-XR-A8TF	693	1	74	MALE	G1	Stage I	T1	MX	NX
TCGA-CC-A7II	399	0	54	MALE	G3	Stage IIIA	T3	M0	N0
TCGA-DD-AADQ	436	0	59	MALE	G3	Stage II	T2	M0	N0
TCGA-K7-A6G5	512	0	66	MALE	G2	Stage I	T1	MX	N0
TCGA-CC-5264	102	1	71	MALE	G2	Stage IIIA	T3	M0	N0
TCGA-DD-A39Y	171	1	67	MALE	G3	Stage I	T1	M0	NX
TCGA-ED-A8O6	56	1	50	FEMALE	G3	Stage IIIA	T3a	M0	N0
TCGA-DD-A1E9	2759	1	70	MALE	G2	Stage I	T1	M0	N0
TCGA-DD-A1EC	602	0	20	FEMALE	G3	Stage I	T1	M0	N0
TCGA-DD-A115	2542	1	53	MALE	G2	Stage IIIA	T3	M0	N0
TCGA-HP-A5MZ	91	1	78	MALE	G2	Stage I	T1	M0	NX
TCGA-DD-A1EK	558	1	64	FEMALE	G2	Stage IVB	T4	M1	N0
TCGA-DD-AAE2	638	0	51	MALE	G3	Stage I	T1	M0	N0
TCGA-CC-A5UE	272	1	48	MALE	G2	Stage IIIB	T4	M0	N0
TCGA-NI-A8LF	606	0	74	MALE	G3	Stage I	T1	MX	NX
TCGA-BW-A5NO	20	0	50	MALE	G2	Stage IIIA	T3a	MX	NX
TCGA-CC-A5UD	304	1	45	MALE	G2	Stage IIIA	T3	M0	N0
TCGA-DD-A1EF	394	1	57	FEMALE	G3	Stage I	T1	M0	N0
TCGA-GJ-A3OU	879	0	59	MALE	G2	Stage I	T1	MX	NX
TCGA-DD-AAVU	2202	0	46	MALE	G2	Stage II	T2	M0	N0
TCGA-G3-A6UC	671	0	65	MALE	G2	Stage IIIB	T3b	M0	N0
TCGA-CC-A9FU	0	0	52	FEMALE	G2	Stage IIIA	T3a	M0	N0
TCGA-DD-AAD3	1295	0	43	MALE	G2	Stage I	T1	M0	N0
TCGA-2Y-A9GU	1939	0	55	FEMALE	G2	Stage I	T1	MX	NX
TCGA-MI-A75G	698	0	63	MALE	G2	Stage II	T2	M0	N0
TCGA-FV-A4ZP	2486	1	78	MALE	G2	Stage IIIA	T3	M0	NX
TCGA-PD-A5DF	639	1	58	FEMALE	G2	Stage IIIB	T4	M0	N0
TCGA-DD-A3A9	931	1	64	FEMALE	G2	Stage IVB	T4	M1	N0
TCGA-DD-AACA	2301	0	65	MALE	G3	Stage I	T1	M0	N0
TCGA-DD-AAW2	1855	0	69	MALE	G2	Stage I	T1	M0	N0
TCGA-DD-AADD	1231	0	51	MALE	G4	Stage I	T1	M0	N0
TCGA-XR-A8TG	898	0	58	MALE	G2	Stage I	T1	M0	NX
TCGA-UB-AA0V	314	0	69	FEMALE	G1	Stage I	unknow	MX	NX
TCGA-CC-A7IE	217	1	57	MALE	G2	Stage IIIA	T3	M0	N0
TCGA-BC-A69I	387	0	69	MALE	G1	Stage I	T1	M0	N0
TCGA-DD-AAE3	566	0	50	MALE	G2	Stage I	T1	M0	N0
TCGA-CC-A1HT	101	1	50	MALE	G3	Stage IIIA	T3	M0	N0
TCGA-ZP-A9D1	21	0	56	FEMALE	G2	unknow	T1	MX	NX
TCGA-EP-A3JL	303	0	76	MALE	G2	Stage I	T1	MX	NX
TCGA-CC-A7IL	278	1	61	MALE	G1	Stage IIIA	T3	M0	N0
TCGA-CC-5263	129	1	35	MALE	G1	Stage IIIA	T3	M0	N0
TCGA-G3-A25X	1779	0	73	MALE	G3	Stage II	T2	M0	N0
TCGA-WQ-A9G7	30	0	71	FEMALE	G3	unknow	T3a	M0	NX
TCGA-G3-A25Z	655	0	58	MALE	G2	Stage I	T1	M0	N0
TCGA-DD-AACX	170	0	66	MALE	G3	Stage II	T2	M0	N0
TCGA-DD-AAE6	141	0	59	FEMALE	G2	Stage I	T1	M0	N0
TCGA-UB-AA0U	327	0	60	MALE	G2	Stage II	T2	MX	NX
TCGA-RG-A7D4	1098	0	69	MALE	G2	Stage II	T2	M0	N0
TCGA-MI-A75I	630	0	61	MALE	G1	unknow	T2	MX	NX
TCGA-DD-AAVX	1718	0	38	MALE	G2	Stage II	T2	M0	N0
TCGA-EP-A2KC	19	1	62	MALE	G3	Stage I	T1	MX	NX
TCGA-DD-AADN	898	0	59	MALE	G4	Stage I	T1	MX	NX
TCGA-DD-A4NV	2018	0	61	MALE	G1	Stage IIIA	T3	M0	N0
TCGA-T1-A6J8	23	0	68	MALE	G2	unknow	T1	M0	NX
TCGA-DD-A4NK	1210	1	80	FEMALE	G2	Stage IIIA	T3	M0	N0
TCGA-CC-A7IJ	382	0	56	MALE	G3	Stage II	T2	M0	N0
TCGA-DD-AADR	2028	0	58	MALE	G3	Stage I	T1	M0	N0
TCGA-DD-A4NH	690	0	65	FEMALE	G3	Stage IIIB	T3b	M0	N0
TCGA-BD-A2L6	1363	0	69	MALE	G2	unknow	T2	MX	NX
TCGA-G3-A3CG	673	0	80	MALE	G2	Stage I	T1	M0	N0
TCGA-RC-A6M3	0	0	24	MALE	G3	Stage II	T2	M0	N0
TCGA-DD-AACB	2324	0	74	FEMALE	G3	Stage I	T1	M0	N0
TCGA-BC-A10Y	711	1	76	MALE	G3	unknow	T4	MX	NX
TCGA-CC-A9FW	248	0	68	MALE	G2	Stage IIIA	T3	M0	N0
TCGA-DD-A1EL	415	1	23	MALE	G3	Stage II	T2	M0	N0
TCGA-DD-AAEE	810	0	55	MALE	G4	Stage I	T1	M0	N0
TCGA-BC-A10W	91	1	50	MALE	G3	unknow	T4	MX	NX
TCGA-CC-A8HU	344	1	39	FEMALE	G3	Stage IIIA	T3	M0	N0
TCGA-RC-A7SK	472	0	59	MALE	G3	Stage I	T1	M0	N0
TCGA-CC-5258	129	1	48	MALE	G2	Stage II	T2	M0	N0
TCGA-UB-A7MF	214	1	56	MALE	G2	Stage IIIA	T3a	MX	NX
TCGA-DD-AACL	107	1	66	FEMALE	G3	Stage I	T1	M0	N0
TCGA-BC-A10T	837	1	76	MALE	G1	unknow	T4	MX	NX
TCGA-DD-AACE	2184	0	62	MALE	G3	Stage I	T1	M0	N0
TCGA-BC-A110	2116	1	51	FEMALE	G1	unknow	T1	MX	NX
TCGA-ED-A7PY	390	0	20	FEMALE	G3	Stage II	T2	M0	NX
TCGA-DD-A4NR	9	1	85	FEMALE	G3	Stage I	T1	M0	N0
TCGA-BC-A8YO	562	0	66	FEMALE	G3	Stage IIIC	T4	M0	N0
TCGA-DD-AADU	554	0	60	MALE	G3	Stage II	T2	M0	N0
TCGA-BC-A10Z	34	1	62	FEMALE	G2	Stage I	T1	MX	N0
TCGA-DD-AACK	9	0	70	MALE	G2	Stage I	T1	M0	N0
TCGA-DD-AAEK	1067	0	51	MALE	G3	Stage II	T2	M0	N0
TCGA-DD-AAW3	1633	0	69	MALE	G2	Stage I	T1	M0	N0
TCGA-2Y-A9GZ	848	1	82	FEMALE	G2	Stage II	T2	MX	NX
TCGA-DD-A73F	1085	0	77	FEMALE	G1	Stage I	T1	M0	N0
TCGA-DD-AACS	1804	0	39	MALE	G3	Stage I	T1	M0	N0
TCGA-ED-A66Y	296	1	51	FEMALE	G3	Stage IIIA	T3a	M0	N0
TCGA-G3-A3CJ	594	0	52	MALE	G2	Stage II	T2	M0	N0
TCGA-2Y-A9H2	1731	0	64	FEMALE	G3	Stage I	T1	MX	N0
TCGA-ED-A7PZ	6	0	61	MALE	G2	Stage II	T2	M0	NX
TCGA-DD-AACI	1618	0	69	MALE	G3	Stage II	T2	M0	N0
TCGA-DD-A116	1622	1	68	MALE	G3	Stage IIIA	T3	M0	N0
TCGA-DD-AAEG	719	0	59	FEMALE	G3	Stage I	T1	M0	N0
TCGA-DD-A114	1149	1	42	MALE	G3	Stage II	T2	M0	unknow
TCGA-ZS-A9CF	2412	0	64	MALE	G2	Stage II	T2	MX	NX
TCGA-RC-A6M6	9	0	75	MALE	G3	Stage II	T2	M0	NX
TCGA-5R-AA1C	364	0	57	MALE	G2	Stage II	T2	M0	N0
TCGA-CC-5262	103	1	67	MALE	G1	Stage IIIC	T4	M0	N0
TCGA-DD-AACO	1876	0	40	MALE	G3	Stage I	T1	M0	N0
TCGA-ZP-A9CY	782	0	66	FEMALE	G1	unknow	T1	MX	NX
TCGA-ZP-A9D4	395	0	64	FEMALE	G1	unknow	T1	MX	NX
TCGA-ZS-A9CE	1241	0	79	FEMALE	G1	Stage II	T2	MX	NX
TCGA-DD-AAVS	1823	0	56	MALE	G2	Stage I	T1	M0	N0
TCGA-XR-A8TC	1339	0	43	FEMALE	G2	Stage I	T1	MX	NX
TCGA-DD-A39W	827	1	29	FEMALE	G2	Stage III	T3	M0	N0
TCGA-BC-A69H	444	0	64	MALE	G3	Stage II	T2	M0	NX
TCGA-DD-A4NA	1008	0	67	FEMALE	G3	Stage IIIC	T2	M0	N1
TCGA-MI-A75E	507	0	61	MALE	G2	Stage IIIC	T4	M0	N0
TCGA-DD-AAVZ	1900	0	38	MALE	G2	Stage I	T1	M0	N0
TCGA-G3-A5SL	621	0	70	MALE	G2	Stage II	T2	M0	NX
TCGA-ED-A7XP	400	0	53	FEMALE	G3	Stage II	T2	M0	N0
TCGA-EP-A2KB	334	0	46	FEMALE	G2	Stage I	T1	MX	NX
TCGA-DD-A4NI	561	0	67	MALE	G2	Stage II	T2	M0	NX
TCGA-CC-A9FV	0	0	57	MALE	G2	Stage IIIA	T3	M0	N0
TCGA-WQ-AB4B	395	0	62	MALE	G2	Stage II	T2	M0	NX
TCGA-G3-AAV1	359	1	51	MALE	G3	Stage IIIC	T4	M0	N0
TCGA-CC-A3MC	363	0	54	MALE	G2	Stage IIIA	T3	M0	N0
TCGA-G3-AAUZ	480	0	48	MALE	G2	Stage I	T1	M0	N0
TCGA-DD-AACM	1769	0	48	MALE	G3	Stage II	T2	M0	N0
TCGA-DD-A11D	1560	1	57	FEMALE	G2	Stage I	T1	M0	N0
TCGA-DD-AACF	365	1	68	MALE	G3	Stage I	T1	M0	N0
TCGA-BD-A3EP	409	0	75	FEMALE	G2	Stage I	T1	M0	N0
TCGA-ED-A4XI	386	0	58	MALE	G3	Stage II	T2	M0	N0
TCGA-DD-A11A	79	0	67	MALE	G3	Stage I	T1	M0	N0
TCGA-QA-A7B7	94	0	48	MALE	G2	Stage II	T2	MX	NX
TCGA-DD-AADL	636	0	58	MALE	G4	Stage I	T1	M0	N0
TCGA-2Y-A9H6	357	0	68	FEMALE	G2	Stage I	T1	MX	NX
TCGA-2Y-A9GY	757	1	64	FEMALE	G3	Stage II	T2	MX	NX
TCGA-DD-A73E	44	0	66	MALE	G1	Stage I	T1	M0	N0
TCGA-RC-A7SF	579	0	66	MALE	G2	Stage I	T1	M0	N0
TCGA-BC-A3KG	498	0	68	FEMALE	G3	Stage II	T2	M0	N0
TCGA-DD-AAVP	2752	0	48	MALE	G1	Stage I	T1	M0	N0
TCGA-ED-A459	408	0	47	MALE	G2	Stage II	T2	M0	N0
TCGA-DD-AACW	1424	0	43	MALE	G3	Stage I	T1	M0	N0
TCGA-3K-AAZ8	396	0	65	MALE	G1	Stage IIIB	T3b	MX	NX
TCGA-G3-A7M5	447	0	76	MALE	G2	Stage I	T1	MX	NX
TCGA-FV-A3R2	194	1	75	MALE	unknow	Stage I	T1	MX	NX
TCGA-BD-A3ER	1115	0	62	MALE	G2	Stage II	T2	MX	NX
TCGA-DD-AADY	555	0	55	FEMALE	G2	Stage I	T1	M0	N0
TCGA-DD-AACY	1450	0	61	MALE	G3	Stage I	T1	M0	N0
TCGA-DD-A1EI	183	0	46	MALE	G2	Stage I	T1	M0	N0
TCGA-2Y-A9HB	260	0	66	MALE	G2	Stage I	T1	MX	NX
TCGA-CC-A123	219	0	24	FEMALE	G1	Stage IIIA	T3	M0	N0
TCGA-XR-A8TE	925	0	16	MALE	G1	Stage IIIA	T3	MX	N0
TCGA-CC-A8HT	140	1	74	MALE	G2	Stage IIIA	T3	M0	N0
TCGA-G3-A5SM	520	0	58	MALE	G3	Stage II	T2	M0	NX
TCGA-ES-A2HS	688	1	80	MALE	G2	Stage I	T1	MX	NX
TCGA-FV-A2QQ	729	0	80	MALE	G2	Stage I	T1	MX	N0
TCGA-DD-AACU	1567	0	59	MALE	G3	Stage I	T1	M0	N0
TCGA-RC-A7SH	468	0	42	MALE	G3	Stage II	T2	M0	N0
TCGA-ZP-A9D2	743	0	51	MALE	G2	unknow	T2	MX	NX
TCGA-DD-AACT	1562	0	69	FEMALE	G2	Stage I	T1	M0	N0
TCGA-DD-AADG	1145	0	70	MALE	G3	Stage IIIA	T3a	M0	N0
TCGA-2Y-A9H0	3675	0	49	MALE	G1	Stage IIIA	T3	M0	N0
TCGA-G3-AAV6	65	1	53	FEMALE	G3	Stage IIIA	T3a	M0	N0
TCGA-DD-A73D	693	0	68	FEMALE	G1	Stage II	T2	MX	NX
TCGA-FV-A2QR	581	1	75	MALE	G1	Stage I	T1	M0	N0
TCGA-DD-AADK	1049	0	68	FEMALE	G3	Stage II	T2	M0	N0
TCGA-DD-A4NE	660	1	75	FEMALE	G3	Stage IIIA	T3a	M0	N0
TCGA-CC-A7IG	299	1	47	MALE	G2	Stage II	T2	M0	N0
TCGA-DD-A1EB	2017	0	72	FEMALE	G2	Stage I	T1	M0	N0
TCGA-DD-A118	3437	0	77	FEMALE	G2	Stage II	T2	M0	N0
TCGA-5R-AAAM	46	1	65	FEMALE	G2	Stage II	T2	M0	N0
TCGA-DD-AAVQ	2728	0	38	MALE	G2	Stage I	T1	M0	N0
TCGA-G3-A25U	1636	0	63	FEMALE	G3	Stage I	T1	M0	N0
TCGA-G3-A7M8	430	0	31	MALE	G1	Stage I	T1	MX	NX
TCGA-DD-A3A5	3125	1	66	FEMALE	G2	Stage III	T3	M0	N0
TCGA-DD-AACZ	171	1	63	FEMALE	G4	Stage I	T1	M0	N0
TCGA-BC-A217	421	0	75	FEMALE	G3	Stage II	T2	M0	NX
TCGA-ED-A7XO	427	0	29	MALE	G2	Stage IIIA	T3a	M0	N0
TCGA-FV-A495	1	0	51	FEMALE	G2	Stage II	T2	M0	NX
TCGA-DD-A1EH	1495	0	23	MALE	G3	Stage III	T3	M0	N0
TCGA-FV-A23B	1852	1	70	FEMALE	unknow	Stage II	T2	M0	N0
TCGA-MI-A75C	291	0	64	MALE	G3	Stage I	T1	M0	N0
TCGA-DD-A4NP	3104	0	32	MALE	G3	Stage I	T1	M0	N0
TCGA-DD-AADF	115	1	64	FEMALE	G4	Stage I	T1	M0	N0
TCGA-DD-AAEA	575	0	65	MALE	G3	Stage I	T1	M0	N0
TCGA-EP-A3RK	363	0	73	MALE	G2	Stage IIIA	T3a	MX	NX
TCGA-BC-4072	1490	1	74	FEMALE	G3	Stage IIIA	T3	M0	N0
TCGA-FV-A3I0	848	0	76	FEMALE	G2	Stage II	T2	M0	NX
TCGA-UB-A7MB	601	0	24	MALE	G3	Stage II	T2	MX	NX
TCGA-ZP-A9CZ	706	0	72	MALE	G1	unknow	T1	MX	NX
TCGA-MI-A75H	747	0	77	MALE	unknow	unknow	unknow	MX	NX
TCGA-G3-A5SJ	698	0	59	MALE	G2	Stage I	T1	M0	NX
TCGA-DD-AAD0	137	0	73	FEMALE	G2	Stage I	T1	M0	N0
TCGA-ED-A82E	408	0	60	FEMALE	G2	Stage IIIA	T3a	M0	N0
TCGA-BC-A5W4	547	1	69	MALE	G3	Stage IIIA	T3a	M0	NX
TCGA-DD-AAEI	1531	0	72	MALE	G2	Stage I	T1	M0	N0
TCGA-2Y-A9GT	1624	1	51	MALE	G2	Stage I	T1	MX	NX
TCGA-XR-A8TD	1030	0	49	FEMALE	G3	Stage IIIB	T3	M0	N0
TCGA-2Y-A9H4	1452	0	68	MALE	G2	Stage I	T1	MX	N0
TCGA-DD-AACD	381	1	48	MALE	G4	Stage I	T1	M0	N0
TCGA-BC-A112	153	1	80	MALE	G2	unknow	T3	MX	NX
TCGA-2Y-A9GV	2532	1	54	FEMALE	G1	Stage I	T1	MX	NX
TCGA-DD-AADJ	1066	0	70	FEMALE	G3	Stage I	T1	M0	N0
TCGA-CC-5260	87	1	61	FEMALE	G1	Stage IIIC	T4	M0	N0
TCGA-LG-A6GG	387	0	79	FEMALE	G2	Stage II	T2	M0	NX
TCGA-G3-AAV0	476	0	58	MALE	G2	Stage I	T1	M0	N0
TCGA-DD-AACQ	432	1	50	MALE	G3	Stage II	T2	M0	N0
TCGA-KR-A7K7	407	0	61	FEMALE	G1	Stage II	T2	M0	N0
TCGA-DD-A4NJ	760	0	54	FEMALE	G2	Stage II	T2	M0	N0
TCGA-DD-AAVV	2455	0	56	MALE	G3	Stage II	T2	M0	N0
TCGA-DD-AAC8	16	1	72	MALE	G3	Stage I	T1	M0	N0
TCGA-G3-A25W	935	0	79	FEMALE	G2	Stage IIIB	T3b	M0	N0
TCGA-WJ-A86L	345	0	68	FEMALE	G2	Stage I	T1	MX	NX
TCGA-CC-A3MB	315	1	36	MALE	G1	Stage IIIA	T3	M0	N0
TCGA-G3-A7M7	361	0	65	MALE	G1	Stage I	T1	MX	NX
TCGA-DD-AADC	425	1	53	MALE	G3	Stage I	T1	M0	N0
TCGA-DD-AACC	1685	1	61	MALE	G2	Stage I	T1	M0	N0
TCGA-G3-A25T	1553	0	45	FEMALE	G2	Stage IIIA	T3	M0	N0
TCGA-G3-A3CH	780	0	53	MALE	G2	Stage IIIA	T3a	M0	N0
TCGA-HP-A5N0	752	1	90	FEMALE	unknow	unknow	TX	M0	NX
TCGA-DD-A3A7	419	1	67	MALE	G3	Stage IIIB	T3b	M0	N0
TCGA-BC-4073	352	0	73	MALE	G3	Stage IIIA	T3	MX	N0
TCGA-2Y-A9HA	36	1	70	MALE	G2	Stage II	T2	MX	NX
TCGA-WX-AA44	615	0	64	FEMALE	G3	Stage I	T1	MX	NX
TCGA-DD-A39Z	601	1	43	FEMALE	G2	Stage II	T2	M0	NX
TCGA-DD-AAD5	1345	0	54	MALE	G3	Stage I	T1	M0	N0
TCGA-2Y-A9H7	1168	0	81	FEMALE	G2	Stage I	T1	MX	N0
TCGA-DD-A1EJ	1005	1	71	FEMALE	G2	Stage IIIC	T1	M0	N1
TCGA-DD-A4NG	802	1	77	MALE	G2	Stage IIIA	T3a	M0	NX
TCGA-CC-A9FS	211	0	55	MALE	G2	Stage II	T2	M0	N0
TCGA-DD-A4NO	2245	0	65	MALE	G1	Stage I	T1	M0	N0
TCGA-DD-AAVY	1970	0	56	MALE	G2	Stage IIIA	T3	M0	N0
TCGA-G3-A25Y	452	1	52	FEMALE	G3	Stage I	T1	M0	N0
TCGA-BC-A3KF	8	0	66	FEMALE	G2	Stage I	T1	M0	NX
TCGA-DD-A119	223	1	40	MALE	G3	Stage IV	T3a	M1	N0
TCGA-DD-AAVR	2513	0	44	MALE	G2	Stage I	T1	M0	N0
TCGA-UB-A7MA	535	0	62	FEMALE	G2	Stage II	T2b	M0	N0
TCGA-ZS-A9CG	341	0	55	MALE	G2	Stage II	T2	MX	NX
TCGA-ES-A2HT	438	1	54	MALE	G2	Stage I	T1	MX	NX
TCGA-G3-A7M9	56	1	70	MALE	G2	Stage IIIB	T3b	MX	NX
TCGA-DD-AADI	1085	0	43	FEMALE	G3	Stage I	T1	M0	N0
TCGA-CC-A7IK	262	1	59	MALE	G3	Stage IIIA	T3	M0	N0
TCGA-DD-AADW	587	0	48	MALE	G3	Stage I	T1	M0	N0
TCGA-FV-A4ZQ	12	0	52	MALE	G2	Stage I	T1	M0	NX
TCGA-DD-AADM	12	1	58	MALE	G3	Stage II	T2	M0	N0
TCGA-DD-AAW0	2015	0	54	MALE	G2	Stage I	T1	M0	N0
TCGA-K7-AAU7	359	0	61	MALE	G2	Stage II	T2a	MX	NX
TCGA-ED-A8O5	406	0	59	FEMALE	G3	Stage IIIA	T3a	M0	N0
TCGA-DD-A73G	3478	0	73	FEMALE	G3	Stage I	T1	M0	N0
TCGA-DD-A11B	14	1	73	MALE	G2	Stage I	T1	M0	N0
TCGA-WX-AA46	756	0	61	MALE	G1	Stage II	T2	MX	NX
TCGA-ED-A66X	406	0	35	MALE	G3	Stage IIIA	T3a	M0	N0
TCGA-BC-A10X	770	1	52	FEMALE	G2	Stage IIIA	T3a	MX	N0
TCGA-DD-AADS	474	0	63	MALE	G2	Stage I	T1	M0	N0
TCGA-MR-A520	229	0	58	MALE	G1	Stage I	T1	MX	NX
TCGA-LG-A9QD	366	0	68	MALE	G2	Stage IIIA	T3a	M0	N0
TCGA-FV-A496	10	0	84	FEMALE	G2	Stage I	T1	M0	NX
TCGA-5C-A9VG	328	0	58	MALE	G2	Stage II	T2	M0	N0
TCGA-BC-A10R	308	1	66	FEMALE	G2	unknow	T3	MX	NX
TCGA-DD-AA3A	410	1	81	FEMALE	G4	Stage I	T1	MX	N0
TCGA-DD-A73A	728	0	71	MALE	G2	Stage I	T1	M0	N0
TCGA-BW-A5NQ	0	0	63	MALE	G3	Stage I	T1	MX	NX
TCGA-DD-A4NB	391	0	25	MALE	G2	Stage I	T1	M0	N0
TCGA-DD-AADO	453	0	55	MALE	G3	Stage I	T1	M0	N0
TCGA-FV-A3R3	366	1	38	FEMALE	G2	Stage I	T1	MX	NX
TCGA-RC-A7SB	588	0	53	MALE	G2	Stage II	T2	M0	N0
TCGA-DD-AAD2	658	0	66	MALE	G2	Stage I	T1	M0	N0
TCGA-DD-A1EG	1372	1	76	MALE	G3	Stage I	T1	M0	N0
TCGA-G3-A3CI	180	0	71	MALE	G2	Stage I	T1	M0	N0
TCGA-DD-AAD1	564	0	51	FEMALE	G4	Stage I	T1	M0	N0
TCGA-DD-A11C	662	0	69	MALE	G3	Stage I	T1	M0	N0
TCGA-WX-AA47	556	1	33	FEMALE	G2	Stage IIIA	T3a	MX	NX
TCGA-NI-A4U2	1791	1	71	MALE	G1	Stage IIIA	T3	MX	NX
TCGA-2Y-A9H3	1516	0	45	MALE	G1	Stage II	T2	MX	NX
TCGA-BC-A216	1351	0	62	FEMALE	G2	Stage IIIA	T3	M0	NX
TCGA-2Y-A9H5	555	1	59	FEMALE	G3	Stage I	T1	MX	N0
TCGA-EP-A12J	330	0	62	MALE	G1	Stage I	T1	MX	NX
TCGA-DD-AACP	415	0	64	MALE	G3	Stage I	T1	M0	N0
TCGA-DD-A3A2	2131	1	76	FEMALE	G1	Stage I	T1	M0	N0
TCGA-DD-A3A0	785	1	70	MALE	G2	Stage I	T1	M0	NX
TCGA-DD-A4ND	2232	0	56	FEMALE	G3	Stage I	T1	M0	N0
TCGA-G3-AAV5	354	0	67	MALE	G2	Stage II	T2	M0	N0
TCGA-DD-AAEB	478	0	60	MALE	G2	Stage I	T1	M0	N0
TCGA-2Y-A9H8	633	1	85	FEMALE	G2	unknow	T1	MX	NX
TCGA-G3-A25S	416	1	64	MALE	G2	Stage I	T1	M0	N0
TCGA-RC-A6M5	15	0	20	FEMALE	G2	Stage IVA	T1	M0	N1
TCGA-DD-AAE4	608	0	49	FEMALE	G1	Stage I	T1	M0	N0
TCGA-DD-AACH	195	1	69	MALE	G3	Stage II	T2	M0	N0
TCGA-DD-AAD8	1219	0	73	FEMALE	G2	Stage I	T1	M0	N0
TCGA-CC-A7IH	365	0	58	MALE	G1	Stage IIIA	T3	M0	N0
TCGA-DD-AAE9	722	0	69	MALE	G3	Stage I	T1	M0	N0
TCGA-DD-AADA	1233	0	66	FEMALE	G3	Stage I	T1	M0	N0
TCGA-DD-A39X	1694	1	78	FEMALE	G2	Stage I	T1	M0	NX
TCGA-DD-AADE	1202	0	50	MALE	G4	Stage I	T1	M0	N0
TCGA-K7-A5RG	519	0	66	MALE	G1	Stage I	T1	MX	NX
TCGA-DD-AAVW	2317	0	35	MALE	G2	Stage I	T1	M0	N0
TCGA-G3-A5SI	768	1	44	MALE	G2	Stage II	T2	M0	N0
TCGA-MR-A8JO	330	0	34	MALE	G3	Stage I	T1	MX	N0
TCGA-DD-AAE1	552	0	52	MALE	G3	Stage I	T1	M0	N0
TCGA-DD-A4NN	899	1	56	FEMALE	G3	Stage I	T1	M0	N0
TCGA-BW-A5NP	0	0	26	FEMALE	G3	Stage IV	T2	M1	N0
TCGA-CC-A8HV	279	1	51	FEMALE	G2	Stage II	T2	M0	N0
TCGA-G3-A3CK	585	0	61	MALE	G2	Stage I	T1	M0	N0
TCGA-EP-A26S	237	0	70	MALE	G2	Stage I	T1	MX	N0
TCGA-2Y-A9GX	2442	0	68	MALE	G2	Stage I	T1	MX	NX
TCGA-RC-A7S9	640	0	47	FEMALE	G3	Stage I	T1	M0	N0
TCGA-YA-A8S7	412	1	68	MALE	G3	Stage IIIA	T3a	MX	N0
TCGA-DD-A3A3	535	1	45	MALE	G2	Stage I	T1	M0	N0
TCGA-O8-A75V	538	0	54	MALE	G2	Stage I	T1	MX	NX
TCGA-ZP-A9D0	717	0	67	FEMALE	G1	unknow	T1	MX	NX
TCGA-DD-A1EE	349	1	73	MALE	G3	Stage IIIA	T3	M0	N0
TCGA-DD-A3A6	3258	1	72	FEMALE	G2	Stage II	T2	M0	N0
TCGA-RC-A6M4	22	0	74	FEMALE	G2	Stage IIIA	T3	MX	NX
TCGA-DD-AAD6	672	0	66	MALE	G3	Stage IIIA	T3a	M0	N0
TCGA-K7-A5RF	631	0	64	MALE	G1	Stage I	T1	MX	NX
TCGA-CC-A8HS	300	1	18	MALE	G1	Stage IIIC	T3	M0	N1
TCGA-G3-A5SK	744	0	58	MALE	G1	Stage I	T1	M0	NX
TCGA-DD-A4NQ	373	1	60	MALE	G3	Stage II	T2	M0	N0
TCGA-DD-A1ED	2301	0	68	MALE	G1	Stage I	T1	M0	N0
TCGA-G3-AAV3	412	0	58	FEMALE	G2	Stage II	T2	M0	N0
TCGA-ZP-A9CV	1088	1	59	MALE	G1	unknow	T1	MX	NX
TCGA-DD-AACV	1531	0	53	MALE	G3	Stage I	T1	M0	N0
TCGA-DD-AACG	469	1	52	MALE	G4	Stage II	T2	M0	N0
TCGA-CC-A3MA	303	1	61	MALE	G2	Stage IIIA	T3	M0	N0
TCGA-2V-A95S		0	unknow	MALE	G3	Stage II	T2	MX	NX
TCGA-2Y-A9H1	1229	1	58	MALE	G2	Stage I	T1	MX	NX
TCGA-DD-A4NF	428	0	72	MALE	G2	Stage I	T1	M0	N0
TCGA-DD-A3A1	233	1	65	MALE	G2	Stage IIIA	T3b	M0	N0
TCGA-KR-A7K2	657	0	64	MALE	G1	Stage I	T1	M0	N0
TCGA-DD-AAC9	347	0	51	MALE	G2	Stage I	T1	M0	N0
TCGA-DD-AACJ	2102	0	75	MALE	G2	Stage II	T2	M0	N0
TCGA-DD-AACN	1302	0	32	MALE	G3	Stage I	T1	M0	N0
TCGA-GJ-A6C0	31	1	75	FEMALE	G2	Stage II	T2	MX	NX
TCGA-DD-AAE8	664	0	45	MALE	G3	Stage I	T1	M0	N0
TCGA-DD-AADV	574	0	50	MALE	G3	Stage I	T1	M0	N0
TCGA-FV-A3I1	247	1	81	FEMALE	G2	Stage II	T2	MX	N0
TCGA-BC-A10Q	1135	1	72	FEMALE	unknow	unknow	T2	MX	NX
TCGA-2Y-A9GS	724	1	58	MALE	G2	unknow	T2	MX	NX
TCGA-ED-A7PX	6	0	48	FEMALE	G3	Stage II	T2	M0	NX
TCGA-DD-A3A8	11	1	75	MALE	G2	Stage II	T2	M0	N0
TCGA-G3-A7M6	632	0	60	FEMALE	G3	Stage I	T1	MX	NX
TCGA-KR-A7K8	906	0	57	MALE	G1	Stage I	T1	M0	N0
TCGA-5R-AA1D	337	0	17	FEMALE	G3	Stage IIIA	T3a	M0	N0
