# Supplementary material for: Cell Differentiation Trajectory in Liver Cirrhosis Predicts Hepatocellular Carcinoma Prognosis and Reveals Potential Biomarkers for Progression of Liver Cirrhosis to Hepatocellular Carcinoma
Source: Front Genet. 2022 Mar 10;13:858905. doi: 10.3389/fgene.2022.858905 (PMC8960263; doi:10.3389/fgene.2022.858905)
Supplement: Supplementary file 6 [file Table5.XLSX]

## Sheet: Sheet1
195 HCC from GEO as validation sets
id	futime	fustat	CD34	RAMP3	riskScore	risk
GSM256425	1.2137	1	4.76872	4.54316	1.22213	high
GSM256426	4.61096	1	5.18749	5.51936	0.83246	low
GSM256427	11.1918	0	4.44779	7.00543	0.307556	low
GSM256428	5.87671	1	6.10012	6.18446	0.77285	low
GSM256429	5.41644	0	5.5271	6.44205	0.569456	low
GSM256430	5.11781	1	4.79292	6.14006	0.535355	low
GSM256431	0.550685	1	5.5106	4.61793	1.46686	high
GSM256432	4.39452	1	4.38577	5.38306	0.7035	low
GSM256433	11.2685	0	6.00338	7.09221	0.467727	low
GSM256434	10.9808	0	4.93368	7.27353	0.309186	low
GSM256435	10.3205	0	5.37345	5.28566	0.994026	high
GSM256436	4.39452	1	4.92891	6.35886	0.497425	low
GSM256437	5.36164	1	5.77635	5.28793	1.11977	high
GSM256438	10.3808	0	5.17705	5.5892	0.800193	low
GSM256439	10.6575	0	4.84832	5.49674	0.761208	low
GSM256440	10.4301	0	4.8219	5.46649	0.767234	low
GSM256441	8.00274	0	4.52607	6.03477	0.522252	low
GSM256442	8.86849	0	5.64769	6.91073	0.462342	low
GSM256443	3.00548	0	5.0651	6.422	0.501292	low
GSM256444	6.49041	0	4.94838	5.54976	0.762907	low
GSM256445	7.80548	1	6.30397	5.63905	1.09153	high
GSM256446	10.8849	0	5.18675	5.69626	0.758943	low
GSM256447	10.5918	0	5.06144	4.68811	1.23667	high
GSM256448	5.53151	1	4.85536	7.71578	0.239838	low
GSM256449	8.93973	1	5.61119	5.06041	1.20014	high
GSM256450	9.8137	0	5.09701	4.90686	1.11514	high
GSM256451	10.0438	0	6.41287	6.45242	0.737856	low
GSM256452	9.54247	0	6.29077	6.636	0.646498	low
GSM256453	9.31507	0	6.06783	5.53354	1.07475	high
GSM256454	9.83288	0	6.16638	4.55317	1.8454	high
GSM256455	10.2356	1	5.83144	4.32149	1.88418	high
GSM256456	6.58904	1	5.73187	4.48814	1.67677	high
GSM256457	9.19452	0	6.11044	5.79868	0.947968	low
GSM256458	10.0055	0	5.70615	6.96638	0.457027	low
GSM256459	2.09315	1	7.22503	4.50729	2.59275	high
GSM256460	5.05205	0	6.9048	7.96763	0.387833	low
GSM256461	1.83288	1	6.03418	4.59597	1.73483	high
GSM256462	10.1589	1	4.8027	4.60827	1.19339	high
GSM256463	9.48767	0	5.22928	6.25574	0.574156	low
GSM256464	8.72055	0	5.43793	4.18822	1.79586	high
GSM256465	9.06575	0	5.28671	4.35638	1.57248	high
GSM256466	8.81644	0	5.02175	7.32184	0.309528	low
GSM256467	8.06849	1	5.92914	6.91324	0.502217	low
GSM256468	8.72055	0	6.16444	5.48866	1.1324	high
GSM256469	7.83288	1	6.00433	6.03969	0.809947	low
GSM256470	0.558904	0	5.07249	5.50072	0.812216	low
GSM256471	4.89041	1	5.60606	5.33987	1.03582	high
GSM256472	8.58356	0	4.37761	4.88332	0.910694	low
GSM256473	8.83288	0	4.02797	7.77117	0.182005	low
GSM256474	7.9726	0	4.41601	7.65412	0.217224	low
GSM256475	8.10411	0	6.20805	5.11456	1.39434	high
GSM256476	1.2	0	4.04239	4.57974	0.965274	high
GSM256477	9.08493	0	6.4104	4.48161	2.06035	high
GSM256478	9.06575	0	4.78954	5.89018	0.609239	low
GSM256479	3.12329	1	3.67293	8.63706	0.104223	low
GSM256480	7.7589	0	4.02173	9.17815	0.0872296	low
GSM256481	7.68493	0	6.72226	5.60266	1.26043	high
GSM256482	7.70411	0	6.17829	5.52143	1.11782	high
GSM256483	3.19726	1	6.49717	4.32942	2.28904	high
GSM256484	2.27397	0	6.302	4.59251	1.88265	high
GSM256485	2.95068	0	5.10351	7.96763	0.226498	low
GSM256486	7.56712	0	7.96312	4.73662	2.86774	high
GSM256487	3.14795	1	7.30886	6.27907	1.05539	high
GSM256488	6.71233	1	4.14962	7.21974	0.251609	low
GSM256489	1.96712	1	6.32739	6.23646	0.80499	low
GSM256490	1.11781	1	6.72283	5.81573	1.12809	high
GSM256491	4.60274	0	5.05098	6.16117	0.571905	low
GSM256492	11.2466	1	5.15279	7.44841	0.301323	low
GSM256493	2.50137	1	5.38014	7.14919	0.376939	low
GSM256494	15.6219	0	4.51957	7.80422	0.207179	low
GSM256495	1.99726	1	3.83186	6.22009	0.385384	low
GSM256496	4.39178	1	4.57496	5.88968	0.571575	low
GSM256497	5.76986	1	6.62151	4.64281	2.0175	high
GSM256498	14.9753	0	4.77142	7.04566	0.331727	low
GSM256499	14.0493	0	7.75602	8.06385	0.475595	low
GSM256500	10.7589	1	6.18506	7.53923	0.391134	low
GSM256501	2.30685	1	6.61553	7.10011	0.559219	low
GSM256502	5.08219	0	5.80136	6.55502	0.582693	low
GSM256503	14.5562	0	3.93465	7.06245	0.256136	low
GSM256504	15.1452	0	7.1278	6.03903	1.13316	high
GSM2011285	2.56	0	5.90482	5.09339	1.28778	high
GSM2011286	2.17	0	5.93617	7.32735	0.405536	low
GSM2011287	0.04	0	6.88438	7.6843	0.446844	low
GSM2011288	0.49	1	5.81032	5.98336	0.787144	low
GSM2011289	0.98	1	6.68975	6.77022	0.679062	low
GSM2011290	0.03	0	6.79907	6.45319	0.82771	low
GSM2011291	0.58	0	6.24728	6.7583	0.598733	low
GSM2011292	0.04	0	7.70041	6.48271	1.06678	high
GSM2011293	1.8	0	6.37792	5.96472	0.941625	low
GSM2011294	0.07	1	6.08215	5.82444	0.927452	low
GSM2011295	0.04	0	6.36991	5.42627	1.24386	high
GSM2011296	2.56	0	5.32892	5.19824	1.02665	high
GSM2011297	1.5	1	5.53319	7.39721	0.3467	low
GSM2011298	2.09	0	5.42797	5.92006	0.725784	low
GSM2011299	3.62	1	6.55328	5.71112	1.13252	high
GSM2011300	0.02	0	6.15931	6.41836	0.696313	low
GSM2011301	0.07	0	6.98042	7.66381	0.464783	low
GSM2011302	4.82	0	6.20072	6.2844	0.755978	low
GSM2011303	3.03	0	6.64102	6.9096	0.62234	low
GSM2011304	0.04	0	6.46932	7.85086	0.361923	low
GSM2011305	0.58	0	5.6501	5.93278	0.770425	low
GSM2011306	1.7	1	6.41376	6.76062	0.628486	low
GSM2011307	0.78	0	3.14811	7.70344	0.144986	low
GSM2011308	1.22	0	6.82623	7.03555	0.615918	low
GSM2011309	1.14	0	5.16304	5.65877	0.768463	low
GSM2011310	1.07	0	6.05391	6.20244	0.75515	low
GSM2011311	1.27	0	6.14858	6.62309	0.623809	low
GSM2011312	0.75	0	6.2996	6.16179	0.830034	low
GSM2011313	2.26	0	5.86805	5.72345	0.917058	low
GSM2011314	0.53	0	6.80564	6.93129	0.646345	low
GSM2011315	0.07	1	5.96957	5.56981	1.02413	high
GSM2011316	2.03	0	6.92808	7.31198	0.549711	low
GSM2011317	1.65	0	6.54901	6.71211	0.671149	low
GSM2011318	1.79	0	6.2035	4.29668	2.13298	high
GSM2011319	0.89	0	6.49587	6.42464	0.767407	low
GSM2011320	2.71	0	5.9615	6.73505	0.556467	low
GSM2011321	2.79	0	6.97808	5.80875	1.22186	high
GSM2011322	0.42	1	5.73211	4.95559	1.31416	high
GSM2011323	0.55	0	5.45908	5.96418	0.715896	low
GSM2011324	0.52	0	5.90973	5.60802	0.986143	high
GSM2011325	0.68	0	6.33927	6.40851	0.738535	low
GSM2011326	0.15	1	7.57573	7.51753	0.599198	low
GSM2011327	3.2	0	6.36495	6.86336	0.587085	low
GSM2011328	2.79	0	6.37689	6.97286	0.556483	low
GSM2011329	4.79	0	6.09438	6.54003	0.640962	low
GSM2011330	1.38	0	6.12084	6.935	0.525802	low
GSM2011331	2.66	0	5.81782	7.49362	0.358947	low
GSM2011332	4.19	0	5.78223	8.20816	0.244686	low
GSM2011333	5.76	0	5.94992	6.72722	0.556815	low
GSM2011334	5.76	0	6.02378	6.70086	0.577108	low
GSM2011335	3.98	1	6.19084	7.03555	0.509483	low
GSM2011336	4.98	0	6.26612	6.78014	0.595294	low
GSM2011337	0.64	0	6.92468	7.53631	0.488534	low
GSM2011338	0.52	1	5.88428	8.05054	0.273864	low
GSM2011339	3.28	0	6.48463	6.38095	0.782459	low
GSM2011340	0.78	0	5.95178	6.62432	0.587834	low
GSM2011341	0.02	0	6.73909	7.25318	0.535727	low
GSM2011342	0.34	0	5.26919	5.51081	0.856828	low
GSM2011343	0.58	0	6.25774	5.9144	0.932586	low
GSM2011344	0.78	0	6.40983	6.92385	0.576529	low
GSM2011345	6.29	1	6.94829	6.21164	0.98158	high
GSM2011346	0.19	1	5.15564	4.39576	1.48139	high
GSM2011347	1.17	0	6.4946	6.13133	0.89388	low
GSM2011348	0.02	0	7.04917	6.23804	0.997764	high
GSM2011349	4.98	0	5.92711	6.80656	0.530625	low
GSM2011350	2.71	1	6.56068	7.74924	0.392172	low
GSM2011351	0.44	0	6.40563	6.64027	0.667564	low
GSM2011352	0.54	0	6.26905	7.22336	0.472872	low
GSM2011353	0.55	0	5.59278	4.06145	2.00938	high
GSM2011354	0.6	1	6.33409	7.16148	0.497956	low
GSM2011355	4.98	0	6.13174	6.98431	0.514127	low
GSM2011356	0.02	0	3.37283	4.0967	1.01674	high
GSM2011357	3.2	0	5.91975	7.24137	0.422056	low
GSM2011358	3.2	0	6.31683	7.67888	0.378258	low
GSM2011359	0.07	1	5.7591	6.30352	0.656013	low
GSM2011360	0.1	0	6.48059	7.93164	0.348165	low
GSM2011361	3.63	0	6.0803	6.44624	0.670264	low
GSM2011362	0.13	0	7.07711	8.14422	0.372391	low
GSM2011363	0.02	0	6.15441	5.2032	1.31021	high
GSM2011364	2.46	0	6.04614	5.95463	0.857316	low
GSM2011365	0.04	0	6.64102	8.5587	0.263386	low
GSM2011366	0.39	0	6.56483	6.9944	0.58203	low
GSM2011367	1.67	0	6.51323	7.04344	0.558662	low
GSM2011368	0.65	0	6.79339	7.51481	0.47505	low
GSM2011369	0.78	0	5.82792	5.78336	0.878266	low
GSM2011370	0.3	0	5.61001	5.87836	0.783169	low
GSM2011371	1.68	0	5.60039	6.82795	0.475966	low
GSM2011372	0.92	1	6.32317	5.86435	0.976133	high
GSM2011373	2.46	0	3.66727	5.14347	0.643203	low
GSM2011374	0.03	0	5.61301	6.22186	0.655332	low
GSM2011375	4.7	0	6.49253	7.19151	0.513967	low
GSM2011376	4.12	0	6.65763	7.16803	0.54659	low
GSM2011377	0.45	1	5.09045	4.16104	1.64198	high
GSM2011378	0.94	0	7.06227	5.9402	1.16997	high
GSM2011379	0.03	0	6.34965	7.47477	0.424877	low
GSM2011380	1.77	1	5.66442	5.39978	1.02161	high
GSM2011381	7.76	0	6.26516	6.67406	0.628966	low
GSM2011382	4.82	1	5.3272	5.54315	0.857219	low
GSM2011383	1.97	0	7.00577	6.86489	0.710317	low
GSM2011384	0.06	0	5.62229	6.18181	0.671017	low
GSM2011385	3.96	1	5.91785	5.96525	0.82054	low
GSM2011386	3.78	0	6.31169	6.80022	0.597162	low
GSM2011387	1.71	1	5.24666	6.38763	0.538786	low
GSM2011388	0.65	1	6.82939	7.75869	0.422842	low
GSM2011389	0.04	0	6.01408	6.45435	0.654366	low
GSM2011390	3.63	0	5.51916	5.41053	0.972781	high
GSM2011391	4.71	0	7.10634	7.20513	0.612981	low
GSM2011392	4.82	0	5.12716	5.73605	0.730249	low
GSM2011393	1.02	0	6.32895	6.00445	0.908931	low
GSM2011394	0.04	0	6.28635	6.80789	0.590297	low
GSM2011395	4.35	0	6.10309	7.02284	0.49961	low
GSM2011396	3.58	0	6.66684	7.73057	0.408759	low
GSM2011397	3.46	0	7.0026	6.809	0.73063	low
GSM2011398	1.16	0	6.47029	5.76353	1.07502	high
GSM2011399	4.43	0	6.23034	6.99665	0.526094	low
